# Supplementary material for: Intrinsic and extrinsic apoptosis responses in leukaemia cells following daunorubicin treatment
Source: Springer Nature journal article supplement (doi:10.1186/s12885-021-08167-y), 2021-04-21
Supplement: MOESM1 [file 19091310]

Al-Aamri et al. *Intrinsic and extrinsic apoptosis responses in leukaemia cells following daunorubicin treatment*

Additional File for

**Intrinsic and extrinsic apoptosis responses in leukaemia cells following daunorubicin treatment**

Hussain Mubarak Al-Aamri <sup>1,2</sup>, Helen R Irving<sup>1</sup>, Christopher Bradley<sup>1</sup> and Terri Meehan-Andrews<sup>1</sup>

<sup>1</sup>Department of Pharmacy and Biomedical Science, La Trobe Institute for Molecular Science (LIMS), La Trobe University, P.O. Box 199, Bendigo, VIC 3552, Australia

<sup>2</sup>Oman College of Health Sciences, PO Box 293, Postal code 620, Ruwi, Sultanate of Oman

The following pages include:

Table S1

Figures S1 and S2

|   | A       | B             | C            | D         | E         | F         | G         | H     | I     | J     | K     | L    | M         | N         |
|---|---------|---------------|--------------|-----------|-----------|-----------|-----------|-------|-------|-------|-------|------|-----------|-----------|
| 1 | Pos     | Pos           | Neg          | Neg       | BLANK     | BLANK     | Bad       | Bax   | Bcl-2 | Bcl-w | BID   | BIM  | Caspase 3 | Caspase 8 |
| 2 | Pos     | Pos           | Neg          | Neg       | BLANK     | BLANK     | Bad       | Bax   | Bcl-2 | Bcl-w | BID   | BIM  | Caspase 3 | Caspase 8 |
| 3 | CD40    | CD40L         | clAP-2       | cytoC     | DR6       | Fas       | FasL      | BLANK | HSP27 | HSP60 | HSP70 | HTRA | IGF-I     | IGF-II    |
| 4 | CD40    | CD40L         | clAP-2       | cytoC     | DR6       | Fas       | FasL      | BLANK | HSP27 | HSP60 | HSP70 | HTRA | IGF-I     | IGF-II    |
| 5 | IGFBP-1 | IGFBP-2       | IGFBP-3      | IGFBP-4   | IGFBP-5   | IGFBP-6   | IGF-1sR   | Livin | p21   | p27   | p53   | SMAC | Survivin  | sTNF-R1   |
| 6 | IGFBP-1 | IGFBP-2       | IGFBP-3      | IGFBP-4   | IGFBP-5   | IGFBP-6   | IGF-1sR   | Livin | p21   | p27   | p53   | SMAC | Survivin  | sTNF-R1   |
| 7 | sTNF-R2 | TNF- $\alpha$ | TNF- $\beta$ | TRAIL R-1 | TRAIL R-2 | TRAIL R-3 | TRAIL R-4 | XIAP  | BLANK | BLANK | Neg   | Neg  | Neg       | Pos       |
| 8 | sTNF-R2 | TNF- $\alpha$ | TNF- $\beta$ | TRAIL R-1 | TRAIL R-2 | TRAIL R-3 | TRAIL R-4 | XIAP  | BLANK | BLANK | Neg   | Neg  | Neg       | Pos       |

**Figure S1.** The array membrane template

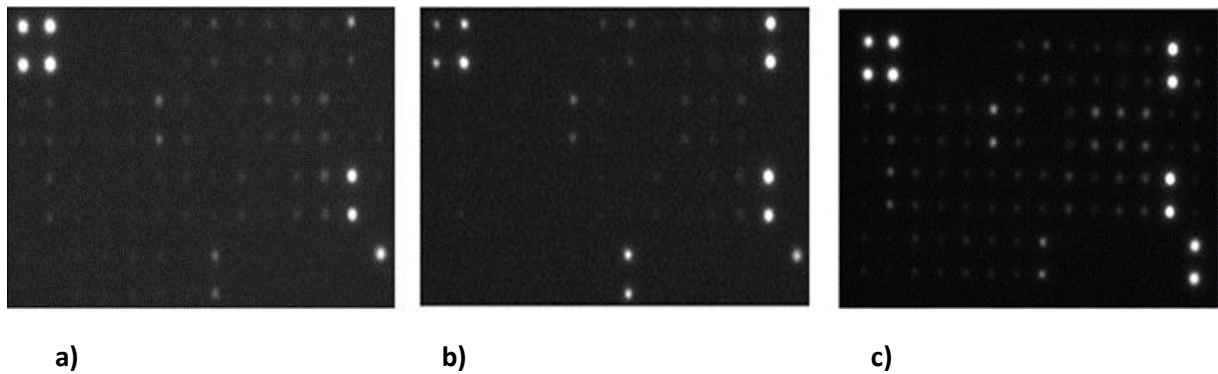

**Figure S2.** Example array panels demonstrating the levels of human apoptotic proteins in MOLT-4 lysates **a)** without treatment (control media) **b)** DNR treated **c)** 12 hour recovery media

**Table S1. Relative changes in levels of apoptosis related protein when treated with DNR for 4 hours and 12 hour in drug free media (recovery media) compared to media only control.**

|                                 | MOLT-4   |                      | CCRF-CEM |                      | SUP-B15  |                      |
|---------------------------------|----------|----------------------|----------|----------------------|----------|----------------------|
|                                 | DNR 4hrs | Recovery Media 12hrs | DNR 4hrs | Recovery Media 12hrs | DNR 4hrs | Recovery Media 12hrs |
| <b>Bad</b>                      | ↑        | —                    | ↓        | —                    | ↑        | —                    |
| <b>Bax</b>                      | ↑        | ↑                    | ↓        | ↓                    | ↑        | —                    |
| <b>Bcl-2</b>                    | ↓        | —                    | ↑        | ↑                    | ↓        | ↓                    |
| <b>Bcl-w</b>                    | —        | —                    | ↑        | ↑                    | ↓        | ↓                    |
| <b>Bid</b>                      | —        | —                    | —        | —                    | ↓        | ↓                    |
| <b>Bim</b>                      | ↓        | —                    | —        | —                    | ↓        | ↓                    |
| <b>Casp-3</b>                   | ↑        | ↑                    | ↑        | ↑                    | ↑        | ↑                    |
| <b>Casp-8</b>                   | ↑        | ↑                    | ↑        | ↑                    | ↑        | ↑                    |
| <b>CD40</b>                     | ↑        | —                    | ↑        | ↑                    | ↑        | ↓                    |
| <b>CD40L</b>                    | —        | —                    | ↑        | ↑                    | —        | ↓                    |
| <b>cIAP-2</b>                   | ↓        | —                    | —        | —                    | —        | ↓                    |
| <b>cytC</b>                     | ↑        | ↑                    | ↓        | ↓                    | ↑        | ↑                    |
| <b>DR6</b>                      | ↓        | —                    | ↓        | —                    | ↓        | ↓                    |
| <b>Fas</b>                      | ↑        | —                    | ↑        | ↑                    | ↑        | —                    |
| <b>FasL</b>                     | ↑        | —                    | ↑        | —                    | ↓        | ↓                    |
| <b>HSP27</b>                    | ↓        | —                    | —        | —                    | ↓        | —                    |
| <b>HSP60</b>                    | ↑        | —                    | —        | —                    | ↑        | —                    |
| <b>HSP70</b>                    | ↓        | ↓                    | —        | —                    | ↓        | ↓                    |
| <b>HTRA2</b>                    | —        | ↓                    | ↓        | —                    | —        | ↓                    |
| <b>IGF-I</b>                    | ↓        | —                    | ↑        | ↑                    | ↓        | ↓                    |
| <b>IGF-II</b>                   | ↓        | —                    | ↑        | ↑                    | ↓        | ↓                    |
| <b>IGFBP-1</b>                  | —        | —                    | —        | ↑                    | ↑        | ↓                    |
| <b>IGFBP- 2</b>                 | ↑        | ↑                    | ↑        | ↑                    | ↑        | ↑                    |
| <b>IGFBP- 3</b>                 | —        | —                    | ↑        | —                    | ↑        | ↓                    |
| <b>IGFBP- 4</b>                 | ↓        | ↑                    | —        | —                    | ↑        | ↑                    |
| <b>IGFBP- 5</b>                 | ↑        | ↑                    | —        | —                    | ↑        | —                    |
| <b>IGFBP- 6</b>                 | ↓        | —                    | ↑        | —                    | —        | ↓                    |
| <b>IGF-1sR</b>                  | ↓        | ↓                    | ↑        | —                    | ↓        | ↓                    |
| <b>Livin</b>                    | ↓        | —                    | ↑        | —                    | —        | ↓                    |
| <b>P21</b>                      | ↑        | ↓                    | ↓        | ↓                    | ↑        | ↓                    |
| <b>P27</b>                      | ↑        | ↓                    | ↓        | —                    | ↑        | ↑                    |
| <b>P53</b>                      | ↑        | ↓                    | ↓        | ↓                    | -        | -                    |
| <b>SMAC</b>                     | ↑        | ↑                    | —        | —                    | ↑        | —                    |
| <b>Survivin</b>                 | —        | ↓                    | ↑        | ↑                    | —        | —                    |
| <b>sTNF-R1</b>                  | ↑        | —                    | ↓        | ↓                    | ↑        | ↓                    |
| <b>sTNF-R2</b>                  | —        | —                    | ↑        | —                    | ↑        | ↓                    |
| <b>TNF- <math>\alpha</math></b> | —        | —                    | ↑        | —                    | —        | ↓                    |
| <b>TNF- <math>\beta</math></b>  | ↓        | ↓                    | ↑        | —                    | ↓        | ↓                    |
| <b>TRAILR-1</b>                 | —        | —                    | ↑        | —                    | —        | ↓                    |
| <b>TRAILR-2</b>                 | ↓        | ↓                    | ↑        | —                    | —        | —                    |
| <b>TRAIL-3</b>                  | ↑        | —                    | ↑        | ↑                    | ↑        | —                    |
| <b>TRAIL-4</b>                  | —        | —                    | ↑        | ↑                    | —        | ↓                    |
| <b>XIAP</b>                     | ↓        | —                    | ↑        | ↑                    | ↑        | ↓                    |

Al-Aamri et al. *Intrinsic and extrinsic apoptosis responses in leukaemia cells following daunorubicin treatment*
